# Supplementary material for: JUNB governs a feed-forward network of TGFβ signaling that aggravates breast cancer invasion
Source: PubMed Central journal article supplement — Nucleic Acids Res. 2017 Nov 23;46(3):1180–95. doi: 10.1093/nar/gkx1190 (PMC5814809; doi:10.1093/nar/gkx1190), 2017-11-23
Supplement: gkx1190_supp.pdf [file gkx1190_supp.pdf]

## Supplementary Data

# **JUNB governs a feed-forward network of TGF $\beta$ signaling that aggravates breast cancer invasion**

Anders Sundqvist<sup>1,2,6,\*</sup>, Masato Morikawa<sup>1,3,6</sup>, Jiang Ren<sup>5</sup>, Eleftheria Vasilaki<sup>1,2</sup>, Natsumi Kawasaki<sup>3</sup>, Mai Kobayashi<sup>3</sup>, Daizo Koinuma<sup>1,3</sup>, Hiroyuki Aburatani<sup>4</sup>, Kohei Miyazono<sup>1,2,3</sup>, Carl-Henrik Heldin<sup>1,2</sup>, Hans van Dam<sup>1,5</sup> & Peter ten Dijke<sup>1,2,5,\*</sup>

<sup>1</sup>Ludwig Cancer Research, <sup>2</sup>Department of Medical Biochemistry and Microbiology, Science for Life Laboratory, Box 582, Biomedical Center, Uppsala University, SE-751 23 Uppsala, Sweden,

<sup>3</sup>Department of Molecular Pathology, Graduate School of Medicine, The University of Tokyo, Tokyo 113-0033, Japan, <sup>4</sup>Genome Science Division, Research Center for Advanced Science and

Technology, The University of Tokyo, Tokyo 153-8904, Japan, <sup>5</sup>Department of Molecular Cell Biology, Cancer Genomics Centre Netherlands, Leiden University Medical Center, P.O. Box 9600, 2300 RC, Leiden, The Netherlands.

\*To whom correspondence should be addressed. Tel: +46 18 160408; Fax: +46 18 160420; Email: anders.sundqvist@imbim.uu.se. Correspondence may also be addressed to: Tel: +31 71 5269271; Fax: +31 71 5268270; Email: [P.ten\\_Dijke@lumc.nl](mailto:P.ten_Dijke@lumc.nl).

<sup>6</sup>The authors wish it to be known that, in their opinion, the first two authors should be regarded as joint First Authors.

## **Supplementary Figure Legends**

### **Supplementary Figures S1-S7**

### **Supplementary Tables S1-S2**

## Supplementary Figure Legends

**Supplementary Figure S1.** SMAD2/3 are redirected to different sites in MCF10A MII after prolonged TGF $\beta$  treatment. **(A)** ChIP-qPCR showing time-dependent recruitment of SMAD2/3 to the SMAD binding site close to the *SERPINE1* transcription start site (TSS), the binding site approximately 5 kb upstream of the *LAMB3* TSS, and to the intronic binding site in the *MMP2* gene locus, in MCF10A MII cells after no treatment, or treatment with TGF $\beta$  (5 ng/ml) for 1.5 h or 16 h. Results of three independent experiments are shown by dot plot chart; \* $p < 0.05$ , \*\* $p < 0.01$ . **(B)** Quantification of overlap between the SMAD2/3 binding sites and histone marks in breast epithelial cells, related to Fig 1E. **(C)** Functional annotation of SMAD2/3 binding regions, performed using GREAT (35). The top five over-represented categories belonging to Gene Ontology (GO) biological process, which describes the biological processes associated with gene function, are presented. The x axis represents binomial raw (uncorrected) P-values in (-log10).

**Supplementary Figure S2.** JUNB is a critical AP1 component for SMAD2/3 binding after TGF $\beta$  stimulation. **(A)** Expression levels of indicated genes in MCF10A MII cells after 1.5 h and 16 h TGF $\beta$  (5 ng/ml) treatment are shown in FPKM (fragments per kilobase of exon per million fragments mapped) values (data represent FPKM  $\pm$  95% confidence interval). **(B and C)** Frequency of *JUNB* gene alterations (mutation, amplification and deletion) in breast cancer datasets using cBioPortal (40,42,43). Patients with *JUNB* amplification had a trend of poorer prognosis **(C)**, although this was not statistically significant because of the small number of the cases. **(D)** Western blot control of JUNB knockdown efficiency of Figure 3C.

**Supplementary Figure S3.** A JUNB-mediated feed-forward mechanism regulates genes associated with cell adhesion and invasion. **(A)** A list of genes whose induction after 16 h TGF $\beta$  (5 ng/ml) treatment was attenuated more than 50 % with siJUNB treatment. See also Fig 4A. **(B)** qRT-PCR validation of identified JUNB target genes. MCF10A MII cells were transfected with non-targeting control (siNTC) or specific JUNB siRNA and stimulated for 1.5 h or 16 h with TGF $\beta$  (5 ng/ml). Results of three independent experiments are shown; \* $p < 0.05$ , \*\* $p < 0.01$ . **(C)** GSEA of expression changes of SMAD2/3 target genes after manipulation of JUNB expression. The SMAD2/3 target genes were pre-rank-ordered according to their fold change (log2) between siNTC and siJUNB, and analyzed based on KEGG signaling pathway enrichment. Gene sets with  $p$ -value  $< 5\%$  and FDR  $q$ -value  $< 25\%$  were considered significant. See also Fig 4B.

**Supplementary Figure S4.** JUNB regulates genes associated with EMT and and invasion. **(A)** qRT-PCR analysis of late TGF $\beta$ -induced gene expression. MCF10A MII cells were stimulated for 16, 48 or 72 h with TGF $\beta$  (5 ng/ml). A representative results of three independent experiments is shown. **(B)** Western blot (left) and qRT-PCR (right) analysis of A549 human pulmonary adenocarcinoma cells transfected with non-targeting control (siNTC) or specific JUNB siRNA and treated with TGF $\beta$  (5 ng/ml) for 48 h (left) or 16 h (right) as indicated. **(C)** A549 mCherry cells transfected with non-targeting control (siNTC) or specific JUNB siRNA were injected into the ducts of

Cuvier (DoC) of 48 hours post-fertilization (hpf) zebrafish embryos. Left: representative images of zebrafish at 6 days post-injection (dpi). Right: quantification of invasive cell cluster numbers in non-targeting and JUNB knock-down cells injected zebrafish larvae.

**Supplementary Figure S5.** Activation of the WNT signaling pathway strengthens the TGF $\beta$ -induced migratory phenotype. **(A)** Genomic locus of the *WNT7B* gene shown together with the results of SMAD2/3 ChIP-seq data obtained in MCF10A MII cells. The direction of transcription is shown by the arrow beginning at the TSS. Statistically significant regions are marked by a gray-colored box. **(B)** Western blot for WNT7A and WNT7B in MCF10A MII cells stable expressing control GFP or MYC-tagged WNT7A (WNT7A-MYC) or WNT7B (WNT7B-MYC). **(C)** Collagen invasion assay of MCF10A MII spheroids. Spheroids were embedded in collagen in the absence or presence of TGF $\beta$  (5 ng/ml), recombinant WNT7A (300 ng/ml) or the WNT inhibitor (WNTi) IWP-2 (5  $\mu$ M), as indicated. Left: representative pictures of spheroids taken 36 h after being embedded in collagen. Right: relative invasion was quantified as the mean area that the spheroids occupied 36 h after being embedded in collagen. Data represent means  $\pm$  SD ( $n \geq 6$  spheroids per condition) and are representative of two independent experiments; \* $p < 0.05$ , \*\* $p < 0.01$ , \*\*\* $p < 0.001$ . **(D)** Collagen invasion assay of MCF10A MII spheroids stably expressing control GFP, WNT7A or WNT7B. Spheroids were embedded in collagen in the absence or the presence of TGF $\beta$  (5 ng/ml). Left: representative pictures of spheroids taken 36 h after being embedded in collagen. Right: relative invasion was quantified as the mean area that the spheroids occupied 36 h after being embedded in collagen. Data represent means  $\pm$  SD ( $n \geq 6$  spheroids per condition) and are representative of two independent experiments; \*\*\* $p < 0.001$ . **(E)** Canonical WNT signaling activity as measured by a TCF/LEF driven transcriptional luciferase reporter plasmid system in the MCF10A MII cells stably expressing control GFP or ectopic WNT7B-MYC.

**Supplementary Figure S6.** ChIP-seq of TNBC cell lines and meta-analysis of published microarray datasets of Breast Cancer patients. **(A)** Kaplan-Meier analysis of relapse-free survival of breast cancer datasets, generated using KM plotter [35]; all subtypes,  $n=3,557$ ; ER $^+$  subjects,  $n=2,036$ ; ER $^-$  subjects,  $n=807$ ; luminal A subtype,  $n=2,069$ ; luminal B subtype,  $n=1,166$ ; HER2- subtype,  $n=239$ ; basal-like subtype,  $n=668$ ). Survival analysis was performed using a log-rank test. **(B)** Genomic loci of *SMAD7* and *WNT7B* are shown together with the results of SMAD2/3 ChIP-seq data obtained in the TNBC cells Hs-578-T and BT-549. The direction of transcription is shown by the arrow beginning at the TSS. Statistically significant regions are marked by a gray-colored box. **(C)** The number of SMAD2/3 binding sites and overlap between 1.5 h and 16 h. The number of ChIP-seq peaks in each time point is presented. The number of peaks overlapping with other conditions is also presented, together with the percent to the total. **(D)** Motifs enriched in the SMAD2/3 binding sites in TNBCs treated with TGF $\beta$  for 1.5 h.

**Supplementary Figure S7.** Working model. The TGF $\beta$ /SMAD-mediated induction of JUNB in premalignant cells causes redirection of SMAD binding to different sites on the genome which results in the activation of an invasion-mediating transcriptional program via a self-enabling mechanism. This

self enabling TGF $\beta$ /SMAD/JUNB-dependent transcriptional program will contribute to make the cell more migratory/invasive. One example of a TGF $\beta$  and JUNB-induced target gene activated by this mechanism is WNT7B. We suggest that in late phases of breast cancer the JUNB/WNT7B signaling pathway contributes to the tumor promoting function of TGF $\beta$ .

**Supplementary Table S1.** Primer sequences used for qRT-PCR. Primer sequences used for qRT-PCR are shown. Fw, forward primer; Rev, reversed primer.

**Supplementary Table S2.** Primer sequences used for ChIP-qPCR. Primer sequences used for ChIP-qPCR are shown. Fw, forward primer; Rev, reversed primer.

## Supplementary Figure S1

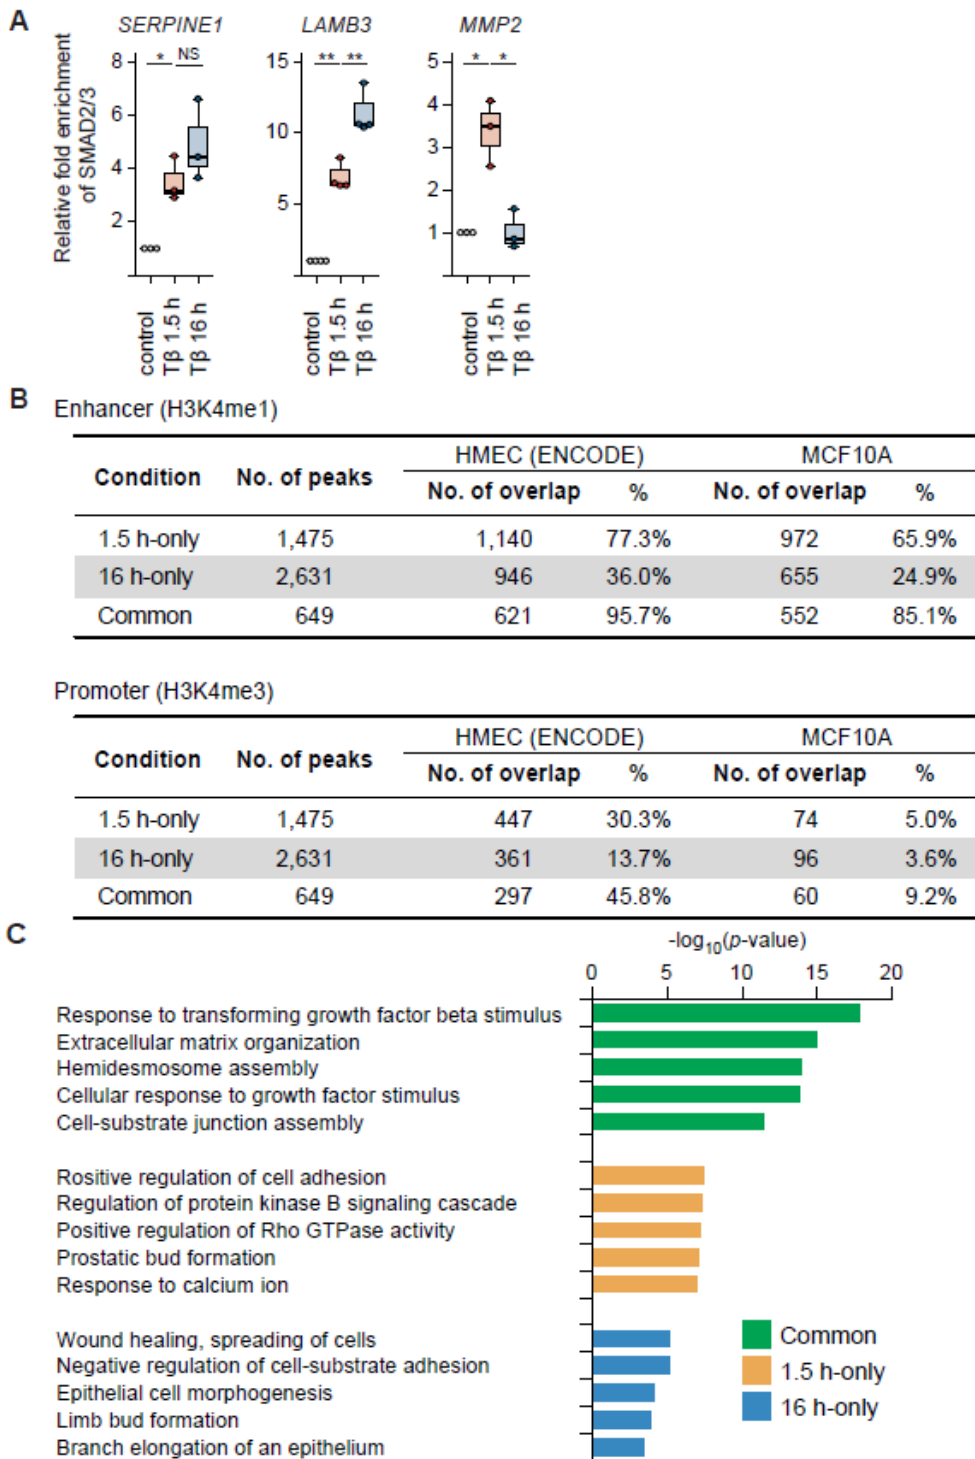

Supplementary Figure S2

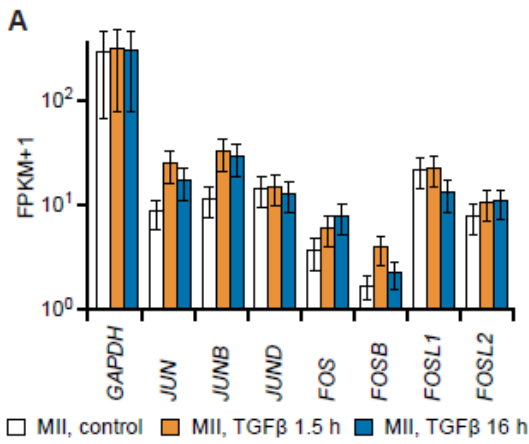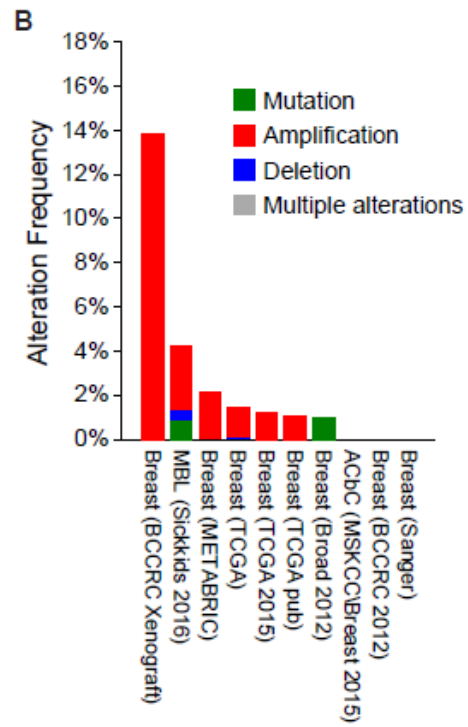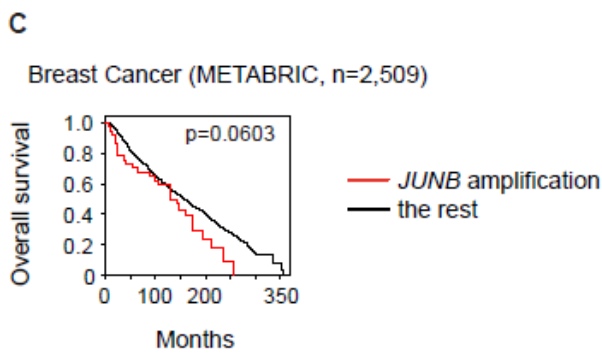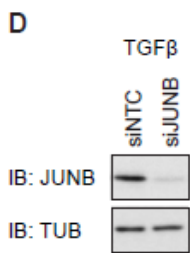

Supplementary Figure S3

A

| Gene Symbol        | TGFβ 16 h |        | Ratio |
|--------------------|-----------|--------|-------|
|                    | siNTC     | siJUNB |       |
| <i>PTGS1</i>       | 3.50      | 0.64   | 0.18  |
| <i>FERMT1</i>      | 8.10      | 1.69   | 0.21  |
| <i>PALM2-AKAP2</i> | 7.91      | 1.67   | 0.21  |
| <i>FN1</i>         | 136.03    | 35.65  | 0.26  |
| <i>BPGM</i>        | 7.31      | 2.09   | 0.29  |
| <i>ANTXR2</i>      | 4.94      | 1.69   | 0.34  |
| <i>SERPINE1</i>    | 49.18     | 17.09  | 0.35  |
| <i>LRR8C</i>       | 4.98      | 1.77   | 0.36  |
| <i>TGM2</i>        | 12.27     | 4.47   | 0.36  |
| <i>SUSD1</i>       | 2.36      | 0.88   | 0.37  |
| <i>WNT7B</i>       | 5.43      | 2.06   | 0.38  |
| <i>COL1A1</i>      | 9.87      | 3.83   | 0.39  |
| <i>WFDC3</i>       | 2.05      | 0.83   | 0.40  |
| <i>SPOCK1</i>      | 4.06      | 1.66   | 0.41  |
| <i>TMEM173</i>     | 2.10      | 0.89   | 0.42  |
| <i>NT5E</i>        | 4.41      | 1.94   | 0.44  |
| <i>ATXN1</i>       | 2.89      | 1.28   | 0.44  |
| <i>TMEM117</i>     | 2.63      | 1.19   | 0.45  |
| <i>FAM83A</i>      | 2.85      | 1.30   | 0.46  |
| <i>ANPEP</i>       | 3.24      | 1.53   | 0.47  |
| <i>FANK1</i>       | 3.92      | 1.85   | 0.47  |
| <i>YAF2</i>        | 2.48      | 1.18   | 0.48  |
| <i>FBXL17</i>      | 2.23      | 1.06   | 0.48  |
| <i>ISG20</i>       | 3.60      | 1.73   | 0.48  |
| <i>LAMA3</i>       | 10.69     | 5.20   | 0.49  |
| <i>EPHB2</i>       | 8.63      | 4.26   | 0.49  |
| <i>TGFBI</i>       | 9.32      | 4.66   | 0.50  |

(fold change)

B

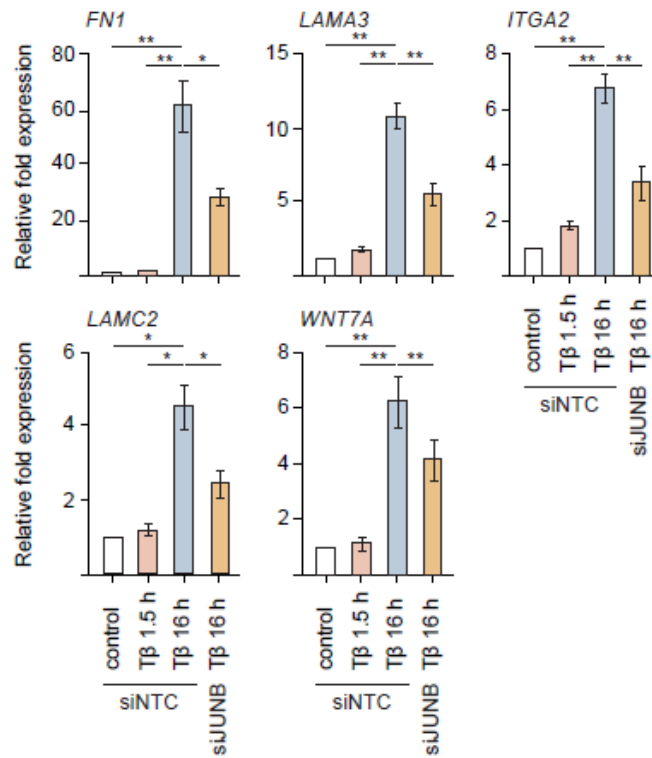

C

| KEGG pathway                                    | ES     | p-value | FDR q-value |
|-------------------------------------------------|--------|---------|-------------|
| ECM receptor interaction                        | 0.737  | 0.000   | 0.002       |
| Focal adhesion                                  | 0.617  | 0.000   | 0.001       |
| Dilated cardiomyopathy                          | 0.781  | 0.000   | 0.006       |
| Pathways in cancer                              | 0.547  | 0.000   | 0.016       |
| Small cell lung cancer                          | 0.673  | 0.000   | 0.026       |
| Hypertrophic cardiomyopathy                     | 0.766  | 0.002   | 0.033       |
| Arrhythmogenic right ventricular cardiomyopathy | 0.724  | 0.003   | 0.066       |
| Melanogenesis                                   | 0.670  | 0.009   | 0.049       |
| Vasopressin regulated water reabsorption        | 0.816  | 0.009   | 0.122       |
| Hedgehog signaling pathway                      | 0.756  | 0.018   | 0.136       |
| Cell adhesion molecules                         | 0.785  | 0.021   | 0.144       |
| WNT signaling pathway                           | 0.544  | 0.025   | 0.147       |
| Tight junction                                  | 0.561  | 0.040   | 0.189       |
| Prostate cancer                                 | 0.609  | 0.041   | 0.204       |
| Complement and coagulation cascades             | 0.780  | 0.044   | 0.211       |
| Spliceosome                                     | -0.684 | 0.007   | 0.057       |

(n=1,436 genes, with SMAD2/3-binding after TGFβ 16 h)





**Supplementary Figure S5**

**A**

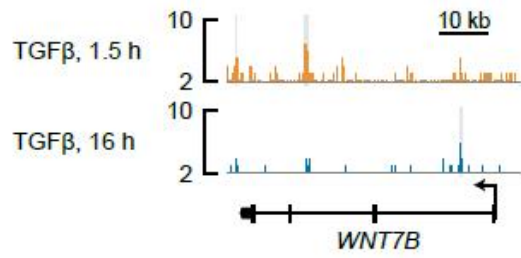

**B**

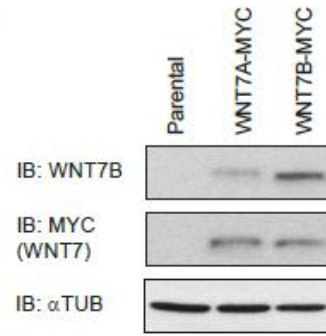

**C**

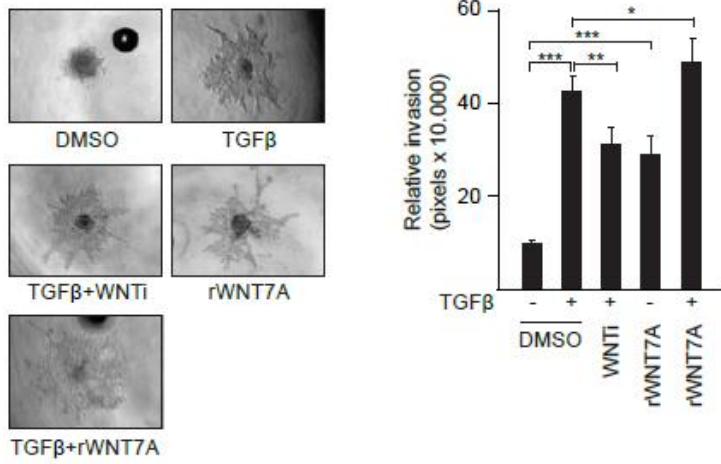

**D**

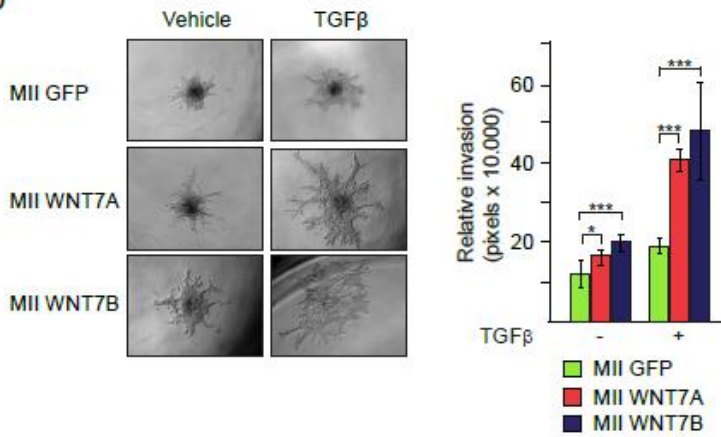

**E**

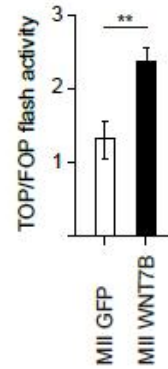

### Supplementary Figure S6

A

Meta-analysis of Breast Cancer datasets (KM plotter, n=3,557)

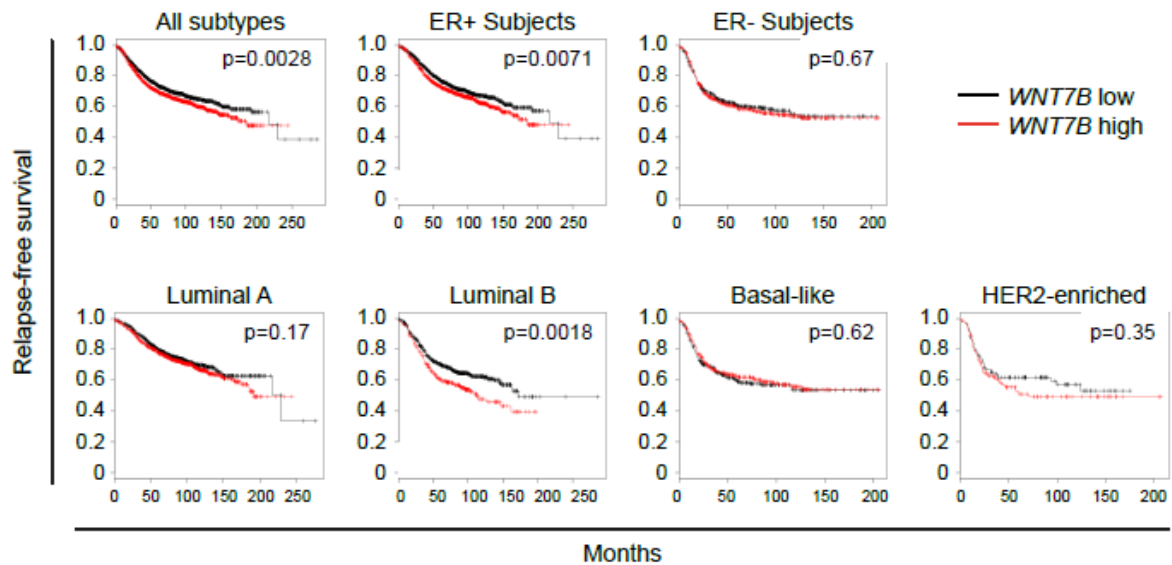

B

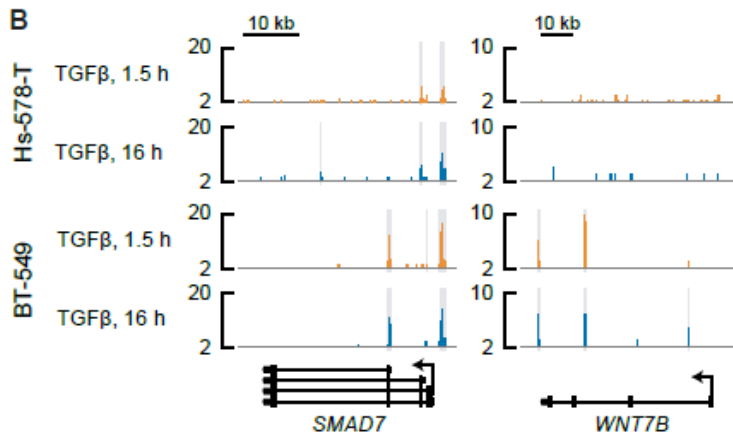

C

|                   | Total | 1.5 h         | 16 h          |
|-------------------|-------|---------------|---------------|
| <b>Hs-578-T</b>   |       |               |               |
| ChIP-seq, 1.5 h   | 1,373 |               | 492 (35.8%)   |
| ChIP-seq, 16 h    | 1,849 | 492 (26.6%)   |               |
| <b>BT-549</b>     |       |               |               |
| ChIP-seq, 1.5 h   | 9,225 |               | 4,376 (47.4%) |
| ChIP-seq, 16 h    | 8,153 | 4,376 (53.7%) |               |
| <b>MCF10A-MII</b> |       |               |               |
| ChIP-seq, 1.5 h   | 2,206 |               | 731 (33.1%)   |
| ChIP-seq, 16 h    | 3,280 | 649 (19.8%)   |               |

D

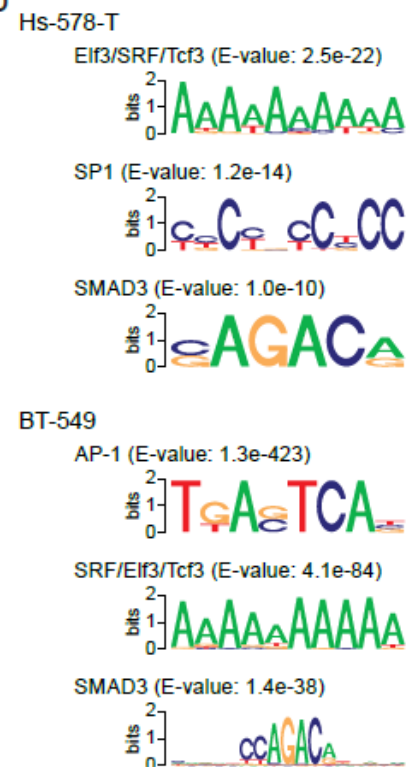

Supplementary Figure S7

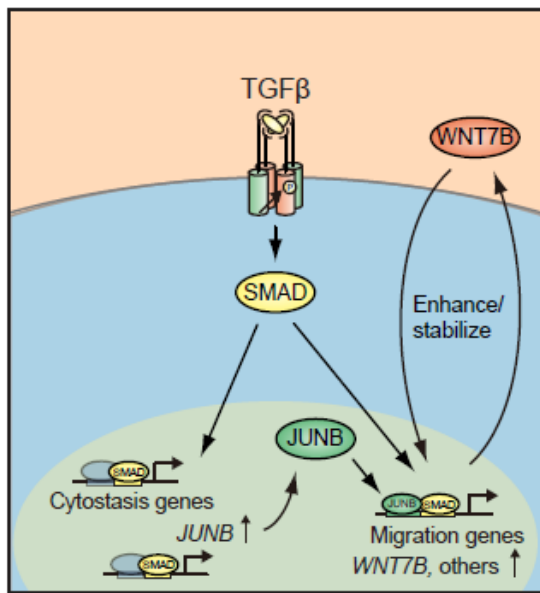

**Supplementary Table S1**

| <b>Primer sequences for RT-qPCR</b>         |                                 |  |
|---------------------------------------------|---------------------------------|--|
| <b>Name</b>                                 | <b>Sequence</b>                 |  |
| <i>CDH2</i> Fw                              | 5'-CCTGCTTCAGGCGTCTGTAGA-3'     |  |
| <i>CDH2</i> Rev                             | 5'-TCATGCACATCCTTCGATAAGACT-3'  |  |
| <i>FERMT1</i> Fw                            | 5'-CTTGGTTCAGTGACAGCCCT-3'      |  |
| <i>FERMT1</i> Rev                           | 5'-GGAGTCTAGCCAACCTGCAT-3'      |  |
| <i>FNI</i> Fw                               | 5'-CATCGAGCGGATCTGGCCC-3'       |  |
| <i>FNI</i> Rev                              | 5'-GCAGTGACTCCGTTGCCCA-3'       |  |
| <i>GAPDH</i> Fw                             | 5'-GGAGTCAACGGATTTGGTCGTA-3'    |  |
| <i>GAPDH</i> Rev                            | 5'-GGCAACAATATCCACTTTACCA-3'    |  |
| <i>ITGA2</i> Fw                             | 5'-GCTGGTGCTCCTCGGGCAAA-3'      |  |
| <i>ITGA2</i> Rev                            | 5'-TGGTCACCTCGGTGAGCCTGA-3'     |  |
| <i>LAMA3</i> transcript variants 2and 4 Fw  | 5'-CCTGGGGCAGTGTCTGGGCT-3'      |  |
| <i>LAMA3</i> transcript variants 2and 4 Rev | 5'-TCCCGCGGTGTTGTGCTGAC-3'      |  |
| <i>LAMB3</i> Fw                             | 5'-ACGGCAGAACACACAGCAAGGA-3'    |  |
| <i>LAMB3</i> Rev                            | 5'-ACCGGGTCCTCCCAACAAGCA-3'     |  |
| <i>LAMC2</i> transcript variant 1 Fw        | 5'-CATCTGATGGACCAGCCTCTC-3'     |  |
| <i>LAMC2</i> transcript variant 1 Rev       | 5'-GCAGTTGGCTGTTGATCTGG-3'      |  |
| <i>MMP1</i> Fw                              | 5'-CCAAATGGGCTTGAAGCT-3'        |  |
| <i>MMP1</i> Rev                             | 5'-GTAGCACATTCTGTCCCTAA-3'      |  |
| <i>MMP2</i> Fw                              | 5'-AGATGCCTGGAATGCCAT-3'        |  |
| <i>MMP2</i> Rev                             | 5'-GGTTCTCCAGCTTCAGGTAAT-3'     |  |
| <i>SERPINE1</i> Fw                          | 5'-GAGACAGGCAGCTCGGATTC-3'      |  |
| <i>SERPINE1</i> Rev                         | 5'-GGCCTCCCAAAGTGCATTAC-3'      |  |
| <i>SNAI1</i> Fw                             | 5'-CACTATGCCGCGCTCTTTC-3'       |  |
| <i>SNAI1</i> Rev                            | 5'-GCTGGAAGGTAAACTCTGGATTAGA-3' |  |
| <i>SNAI2</i> Fw                             | 5'-AGACCCTGGTTGCTTCAAGGA-3'     |  |
| <i>SNAI2</i> Rev                            | 5'--3'                          |  |
| <i>WNT7B</i> Fw                             | 5'-AAGCTCGGAGCACTGTCATC-3'      |  |
| <i>WNT7B</i> Rev                            | 5'-ACTGGTACTGGCACTCGTTG-3'      |  |

**Supplementary Table S2**

| <b>Primer sequences for ChIP-qPCR</b> |                              |
|---------------------------------------|------------------------------|
| <b>Name</b>                           | <b>Sequence</b>              |
| <i>HBB</i> Fw                         | 5'-AACGTGATCGCCTTTCTC-3'     |
| <i>HBB</i> Rev                        | 5'-GAAGCAGAACTCTGCACTTC-3'   |
| <i>HPRT1</i> Fw                       | 5'-TGTTTGGGCTATTTACTAGTTG-3' |
| <i>HPRT1</i> Rev                      | 5'-ATAAAATGACTTAAGCCCAGAG-3' |
| <i>SERPINE1</i> Fw                    | 5'-GCAGGACATCCGGGAGAGA-3'    |
| <i>SERPINE1</i> Rev                   | 5'-CCAATAGCCTTGGCCTGAGA-3'   |
| <i>LAMB3</i> Fw                       | 5'-TTGCCCTGCACTACAACACA-3'   |
| <i>LAMB3</i> Rev                      | 5'-GTAACACACCAGGCCCACTT-3'   |
| <i>MMP2</i> Fw                        | 5'-TCCCAGGCCTGCCCATGTCA-3'   |
| <i>MMP2</i> Rev                       | 5'-GGAGCTGGTGGGTGGAAAGCC-3'  |
| <i>WNT7B</i> Fw                       | 5'-TCACCCATGACTCACTTGGC-3'   |
| <i>WNT7B</i> Rev                      | 5'-AGGTCTCTCCGCTCTCAGT-3'    |
